# Supplementary material for: Sequential analysis for identification of byproduct from N-benzylation reaction: wound healing and anti-inflammatory potential of the byproduct 4-chlorobenzyl 2-((4-chlorobenzyl)amino)benzoate
Source: Royal Society of Chemistry journal article supplement (doi:10.1039/d3ra03720g), 2023-01-01
Supplement: d3ra03720g1.pdf [file d3ra03720g1.pdf]

## **Supporting Information of**

### **Sequential analysis for identification of byproduct from N-benylation reaction: Wound healing and anti-inflammatory potential in byproduct 4-chlorobenzyl 2-((4-chlorobenzyl)amino) benzoate**

# **Sequential analysis for identification of byproduct from N-benylation reaction: Wound healing and anti-inflammatory potential in byproduct 4-chlorobenzyl 2-((4-chlorobenzyl)amino) benzoate**

Ekta Verma<sup>1</sup>, Shailendra Patil<sup>2</sup>, and Asmita Gajbhiye<sup>1\*</sup>

<sup>1</sup>Department of Pharmaceutical Sciences, Dr. Harisingh Gour University, Sagar, Madhya Pradesh, India

<sup>2</sup>Swami Vivekanand University, Sagar, Madhya Pradesh, India

\*Corresponding author: E-mail: [drasmitagajbhiye27@gmail.com](mailto:drasmitagajbhiye27@gmail.com)

## **Table of Contents**

|                                                                                                       |    |
|-------------------------------------------------------------------------------------------------------|----|
| TLC* image of crude compound (NaH, 30°C).....                                                         | S3 |
| Standard curve for Hydroxyproline .....                                                               | S4 |
| Crystal data and structure refinement for CCAB. ....                                                  | S5 |
| Interatomic distances (Å) of 4-chlorobenzyl 2-((4-chlorobenzyl)amino) benzoate.....                   | S6 |
| Bond Angles (degree) of 4-chlorobenzyl 2-((4-chlorobenzyl)amino)benzoate.....                         | S6 |
| Wound Contraction (mm) data of negative control, 10%, 5% formulation and standard (0.2%) groups ..... | S8 |

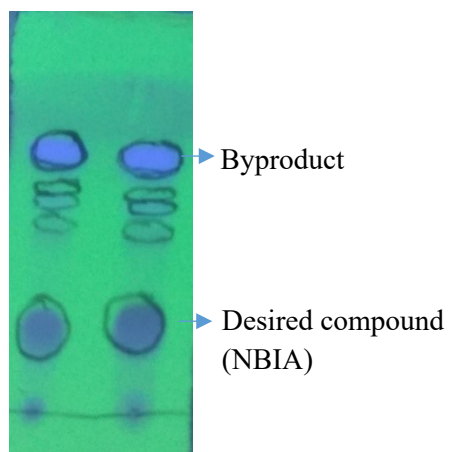

**Figure S1. TLC\* image of crude compound (NaH, 30°C)**  
NBIA- N-benzylated isatoic anhydride

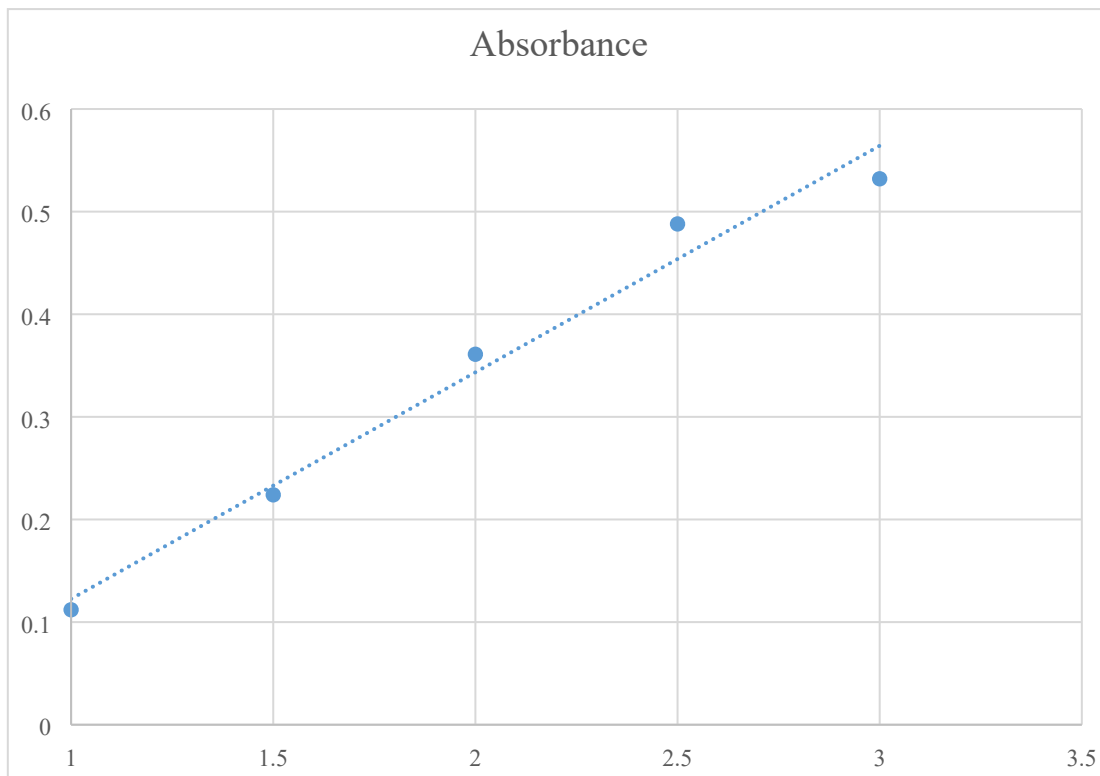

**Figure S2. Standard curve for Hydroxyproline**

**Table S1. Crystal data and structure refinement for CCAB.**

|                                             |                                                                 |
|---------------------------------------------|-----------------------------------------------------------------|
| Identification code                         | M                                                               |
| Empirical formula                           | C <sub>21</sub> H <sub>17</sub> Cl <sub>2</sub> NO <sub>2</sub> |
| Formula weight                              | 386.26                                                          |
| Temperature/K                               | 296.15                                                          |
| Crystal system                              | monoclinic                                                      |
| Space group                                 | P2 <sub>1</sub> /c                                              |
| a/Å                                         | 15.168(8)                                                       |
| b/Å                                         | 5.683(3)                                                        |
| c/Å                                         | 21.306(11)                                                      |
| α/°                                         | 90                                                              |
| β/°                                         | 100.272(9)                                                      |
| γ/°                                         | 90                                                              |
| Volume/Å <sup>3</sup>                       | 1807.1(16)                                                      |
| Z                                           | 4                                                               |
| ρ <sub>calc</sub> /g/cm <sup>3</sup>        | 1.420                                                           |
| μ/mm <sup>-1</sup>                          | 0.375                                                           |
| F(000)                                      | 800.0                                                           |
| Crystal size/mm <sup>3</sup>                | 0.36 × 0.22 × 0.2                                               |
| Radiation                                   | MoKα (λ = 0.71073)                                              |
| 2θ range for data collection/°              | 8.034 to 58.276                                                 |
| Index ranges                                | -16 ≤ h ≤ 20, -7 ≤ k ≤ 7, -28 ≤ l ≤ 23                          |
| Reflections collected                       | 7043                                                            |
| Independent reflections                     | 4330 [R <sub>int</sub> = 0.0496, R <sub>sigma</sub> = 0.0887]   |
| Data/restraints/parameters                  | 4330/0/239                                                      |
| Goodness-of-fit on F <sup>2</sup>           | 0.897                                                           |
| Final R indexes [I ≥ 2σ (I)]                | R <sub>1</sub> = 0.0598, wR <sub>2</sub> = 0.1454               |
| Final R indexes [all data]                  | R <sub>1</sub> = 0.1098, wR <sub>2</sub> = 0.1803               |
| Largest diff. peak/hole / e Å <sup>-3</sup> | 0.30/-0.40                                                      |

**Table S2 .Interatomic distances (Å) of 4-chlorobenzyl 2-((4-chlorobenzyl)amino)**

## benzoate

| Atom | Atom | Length/Å | Atom | Atom | Length/Å |
|------|------|----------|------|------|----------|
| C11  | C1   | 1.754(3) | C8   | C9   | 1.470(4) |
| C12  | C19  | 1.737(3) | C9   | C10  | 1.411(4) |
| O1   | C7   | 1.439(4) | C9   | C14  | 1.421(4) |
| O1   | C8   | 1.345(3) | C10  | C11  | 1.377(4) |
| O2   | C8   | 1.223(3) | C11  | C12  | 1.392(4) |
| N1   | C14  | 1.373(4) | C12  | C13  | 1.380(4) |
| N1   | C15  | 1.451(4) | C13  | C14  | 1.404(4) |
| C1   | C2   | 1.376(4) | C15  | C16  | 1.511(4) |
| C1   | C6   | 1.380(4) | C16  | C17  | 1.396(4) |
| C2   | C3   | 1.389(4) | C16  | C21  | 1.393(4) |
| C3   | C4   | 1.384(4) | C17  | C18  | 1.388(5) |
| C4   | C5   | 1.389(4) | C18  | C19  | 1.386(4) |
| C4   | C7   | 1.508(4) | C19  | C20  | 1.373(4) |
| C5   | C6   | 1.380(4) | C20  | C21  | 1.386(4) |

Table S3. Bond Angles (degree) of 4-chlorobenzyl 2-((4-chlorobenzyl)amino)benzoate

| Atom | Atom | Atom | Angle/°  |
|------|------|------|----------|
| C8   | O1   | C7   | 116.2(2) |
| C14  | N1   | C15  | 122.7(3) |
| C2   | C1   | C11  | 119.3(2) |
| C2   | C1   | C6   | 121.6(3) |
| C6   | C1   | C11  | 119.0(2) |
| C1   | C2   | C3   | 118.7(3) |
| C4   | C3   | C2   | 121.0(3) |
| C3   | C4   | C5   | 118.8(3) |
| C3   | C4   | C7   | 123.6(3) |
| C5   | C4   | C7   | 117.6(3) |
| C6   | C5   | C4   | 121.0(3) |
| C5   | C6   | C1   | 118.8(3) |
| O1   | C7   | C4   | 109.1(2) |
| O1   | C8   | C9   | 112.4(2) |
| O2   | C8   | O1   | 121.6(3) |
| O2   | C8   | C9   | 125.9(3) |
| C10  | C9   | C8   | 119.3(3) |
| C10  | C9   | C14  | 119.1(3) |
| C14  | C9   | C8   | 121.6(3) |
| C11  | C10  | C9   | 121.9(3) |
| C10  | C11  | C12  | 118.7(3) |
| C13  | C12  | C11  | 120.9(3) |
| C12  | C13  | C14  | 121.6(3) |
| N1   | C14  | C9   | 121.4(3) |
| N1   | C14  | C13  | 120.8(3) |
| C13  | C14  | C9   | 117.8(3) |
| N1   | C15  | C16  | 115.0(3) |
| C17  | C16  | C15  | 119.5(3) |
| C21  | C16  | C15  | 122.7(3) |
| C21  | C16  | C17  | 117.9(3) |
| C18  | C17  | C16  | 121.1(3) |

|            |     |     |          |
|------------|-----|-----|----------|
| <b>C19</b> | C18 | C17 | 119.3(3) |
| <b>C18</b> | C19 | C12 | 119.3(2) |
| <b>C20</b> | C19 | C12 | 119.8(3) |
| <b>C20</b> | C19 | C18 | 120.9(3) |
| <b>C19</b> | C20 | C21 | 119.4(3) |
| <b>C20</b> | C21 | C16 | 121.5(3) |

**Table S4. Wound Contraction (mm) data of negative control, 10%, 5% formulation and standard (0.2%) groups**

| S. No. | Group                   | Time (Days)                    |                                 |                                 |                     |                    |                    |                    |                   |                   |                   |                   |
|--------|-------------------------|--------------------------------|---------------------------------|---------------------------------|---------------------|--------------------|--------------------|--------------------|-------------------|-------------------|-------------------|-------------------|
|        |                         | 0                              | 2                               | 4                               | 6                   | 8                  | 10                 | 12                 | 14                | 16                | 18                | 20                |
| I      | <b>Negative control</b> | 214.83±2.04<br>1               | 178.50±11.46<br>7               | 165.50±9.586                    | 150.83±8.424        | 137.33±10.70<br>8  | 127.67±7.062       | 116±4.336          | 94.67±21.97<br>9  | 75.00±16.43<br>2  | 13.50±1.8<br>71   | 4.00±6.2<br>29    |
| II     | <b>10 %</b>             | 209.17±9.32<br>6 <sup>NS</sup> | 174.83±13.39<br>4 <sup>NS</sup> | 145.67±13.73<br>6 <sup>NS</sup> | 123.33±8.454<br>**  | 91.83±18.798<br>** | 69.97±14.787<br>** | 64.17±15.497<br>** | 21.83±9.152<br>** | 2.00±1.897*<br>*  | 0±0 <sup>NS</sup> | 0±0 <sup>NS</sup> |
| III    | <b>5%</b>               | 211.17±6.79<br>5 <sup>NS</sup> | 177.67±15.38<br>4 <sup>NS</sup> | 155.83±15.38<br>1 <sup>NS</sup> | 112.83±17.75<br>9** | 73.67±9.522<br>**  | 59.00±7.925<br>**  | 40.33±10.727<br>** | 24.33±5.317<br>** | 12.67±2.160<br>** | 0±0 <sup>NS</sup> | 0±0 <sup>NS</sup> |
| IV     | <b>Std 0.2%</b>         | 213.33±1.96<br>6 <sup>NS</sup> | 164.17±12.20<br>5 <sup>NS</sup> | 144.00±8.764<br>**              | 110.50±10.56<br>**  | 85.50±10.858<br>** | 45.50±6.745<br>**  | 15.50±4.370<br>**  | 2.00±2.530*<br>*  | 0±0 <sup>NS</sup> | 0±0 <sup>NS</sup> | 0±0 <sup>NS</sup> |

Values are expressed as MEAN±SD at n=6, One way ANOVA followed by Bonferroni test, \*P<0.050, \*\*P<0.001 and <sup>NS</sup>P>0.001 compared to the negative control
